# Supplementary material
Source: publisher site journal article supplement (https://www.dovepress.com/article/432790)
Supplement: Supplementary file 1 [file get_supplementary_file.php]

**Supplemental Experimental Procedures**

**Supplement 1**

**Standard curve at pH 6.8 phosphate buffer (simulated intestinal fluid)**

The standard curve was prepared to by diluting the pure Metformin solution from 1 µg/ml to 10 µg/ml. The standard curve obtained at 233 nm had a slope of 0.133 & R2 value of 0.9973.

Figure S6 represents the standard curve of Metformin HCl in standard solution.

Equation of the standard curve: y = 0.133x + 0.0572

Where, y = Absorbance and x = Concentration (μg/ml)

**Supplemental Figures**


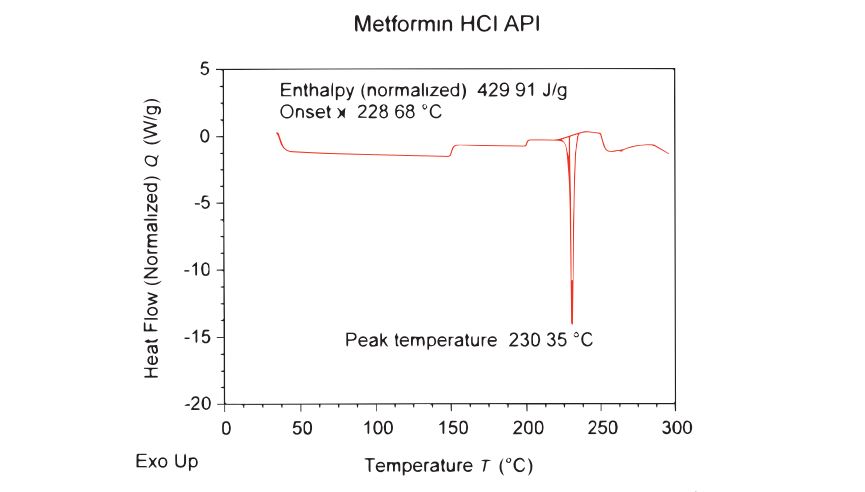


**Figure S1.** DSC thermogram of pure metformin HCl, related to figure 3.


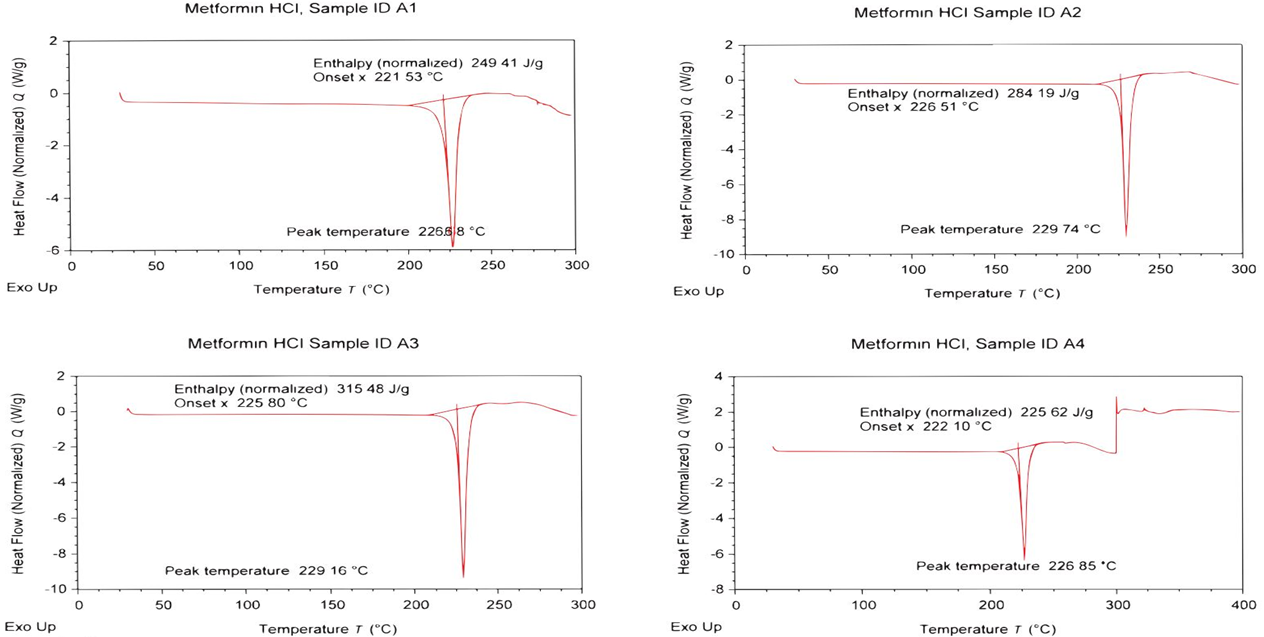


**Figure S2.** DSC thermogram of all batches metformin HCl loaded microspheres (A1, A2, A3 and A4), related to figure 3.


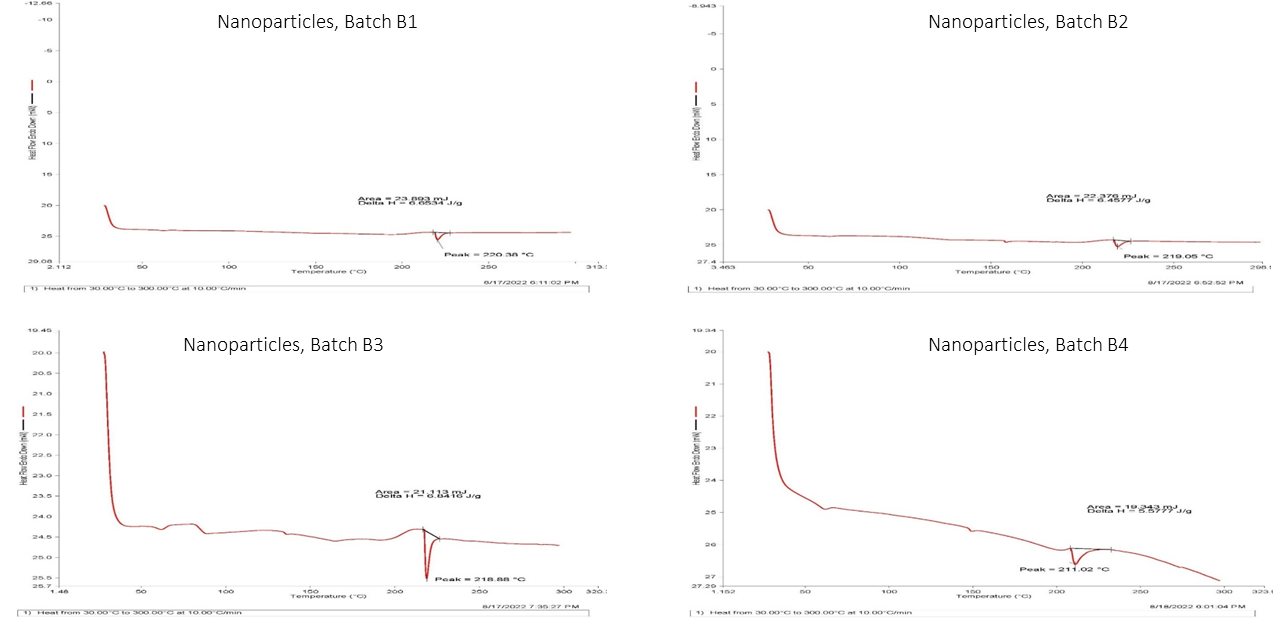
 **Figure S3.** DSC thermogram of all batches metformin HCl loaded nanoparticles (B1, B2, B3 and B4), related to figure 3.

**
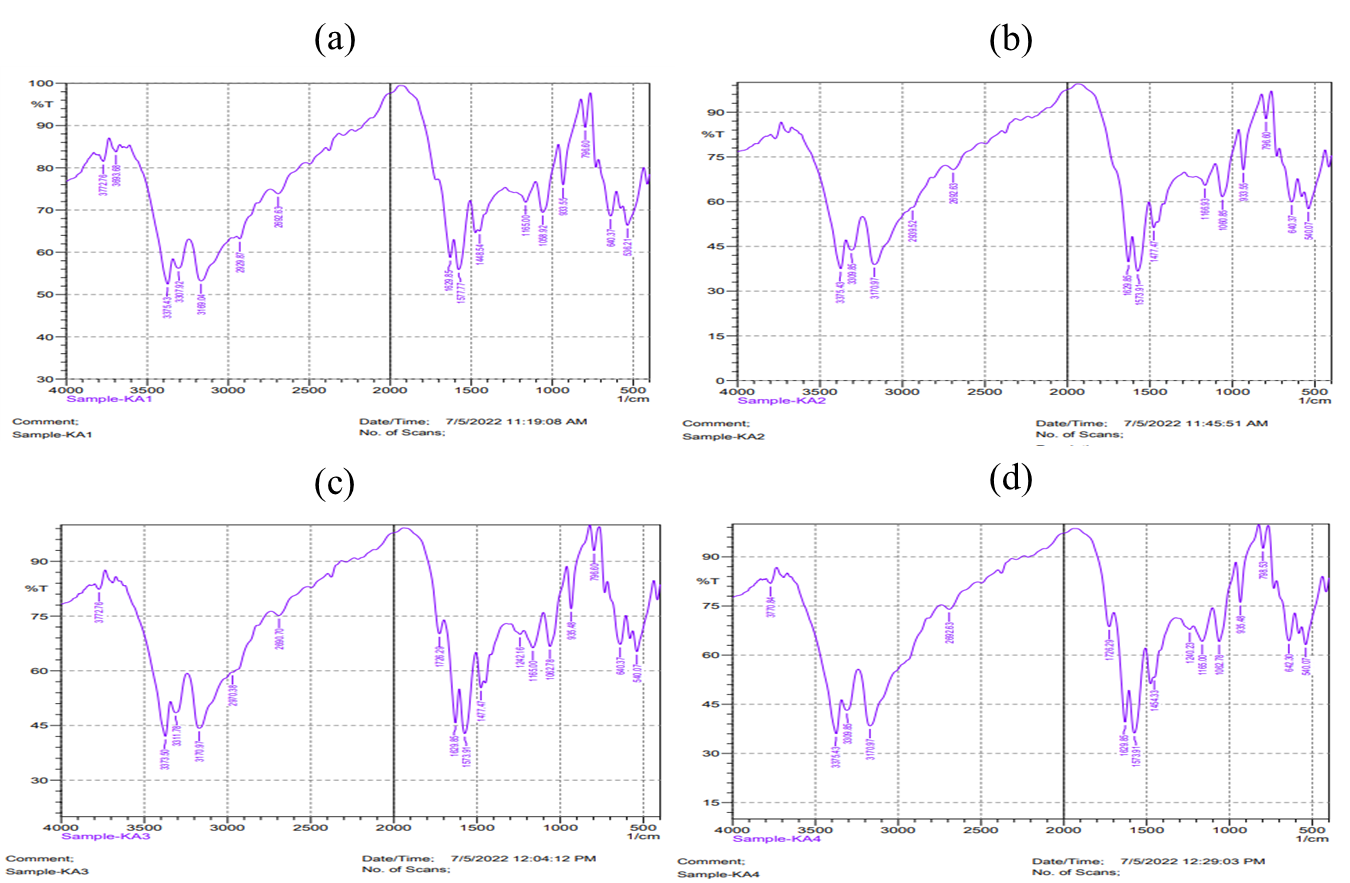
**

**Figure S4.** FTIR spectrum of metformin HCl loaded microspheres of batch (a) A1, (b) A2, (c) A3 and (d) A4, related to figure 4.


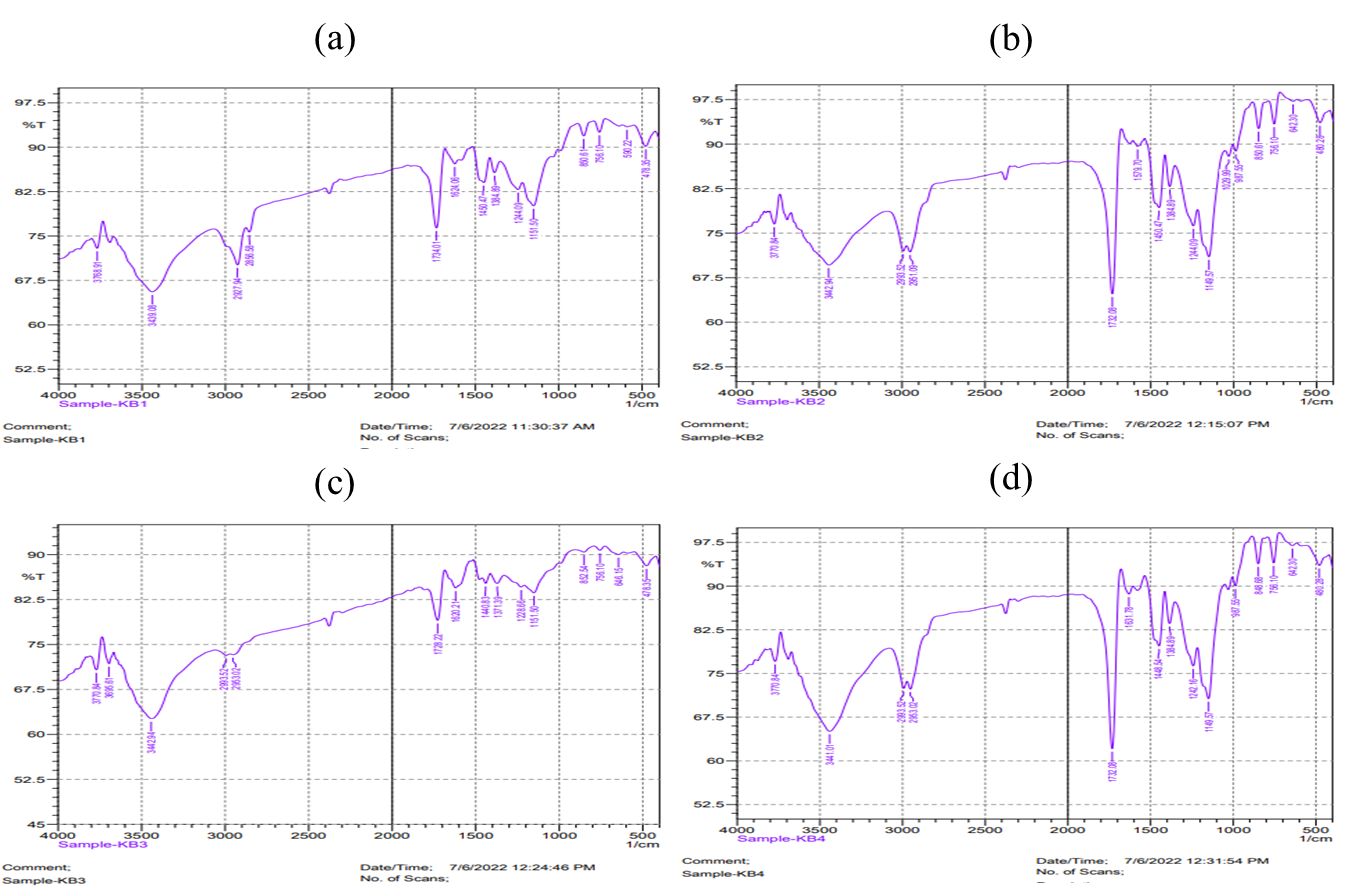


**Figure S5.** FTIR spectrum of metformin HCl loaded nanoparticles of batch (a) B1, (b) B2, (c) B3 and (d) B4, related to figure 4.


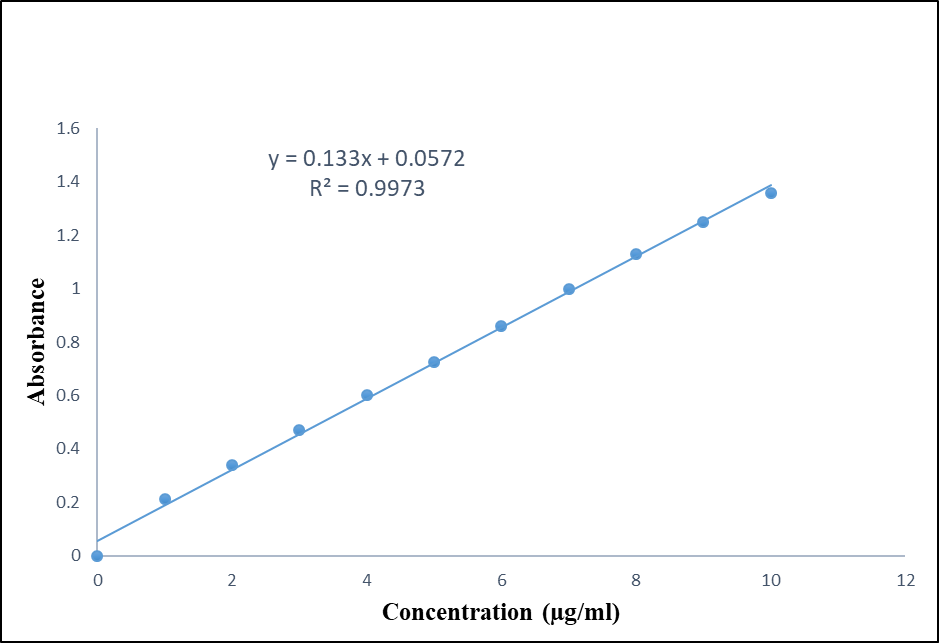


**Figure S6.** Standard curve of metformin HCl in phosphate buffer (pH 6.8).

**
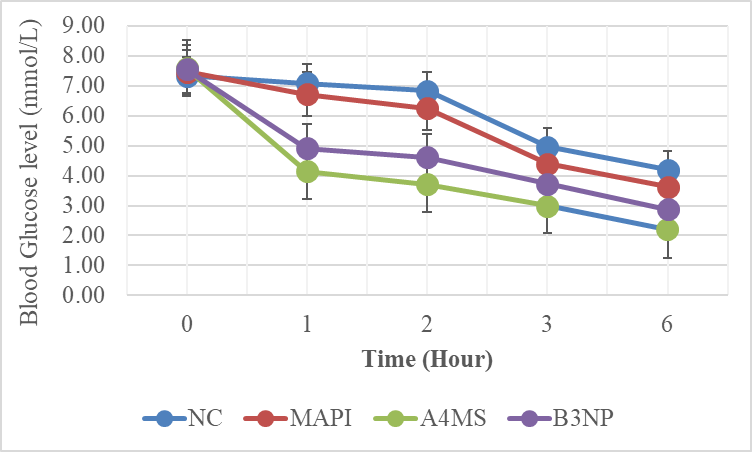
**

**Figure S7.** Effect of metformin HCl API powder (MAPI), selected formulation A4 of microspheres (A4MS) and B3 of nanoparticles (B3NP) (n=6) on blood sugar level in mice model during hypoglycemic study.

**Supplemental Tables**

**Table S1.** Zero order release profile of 4 batches of metformin HCl microspheres and nanoparticles (n=3).

| **Time (Hour)** | **Cumulative % of Drug Release** | | | | | | | |
| --- | --- | --- | --- | --- | --- | --- | --- | --- |
| **Microspheres** | | | | **Nanoparticles** | | | |
| **A1** | **A2** | **A3** | **A4** | **B1** | **B2** | **B3** | **B4** |
| **0** | 0.00% | 0.00% | 0.00% | 0% | 0.00% | 0.00% | 0.00% | 0% |
| **1** | 26.54% | 26.54% | 27.93% | 31.62% | 11.56% | 16.16% | 18.53% | 18.53% |
| **2** | 59.43% | 35.05% | 29.95% | 51.38% | 13.72% | 20.99% | 19.54% | 25.88% |
| **3** | 67.97% | 47.63% | 38.32% | 65.40% | 23.13% | 30.49% | 25.88% | 28.63% |
| **4** | 70.80% | 49.79% | 47.65% | 78.12% | 25.28% | 31.72% | 29.54% | 34.08% |
| **5** | 72.21% | 55.38% | 51.42% | 87.61% | 26.33% | 34.10% | 42.24% | 36.83% |
| **6** | 81.97% | 60.98% | 57.47% | 89.72% | 30.52% | 36.48% | 45.02% | 38.66% |
| **7** | 84.81% | 78.43% | 60.76% | 91.82% | 34.72% | 37.68% | 51.38% | 39.57% |
| **8** | 89.70% | 83.40% | 64.96% | 96.01% | 35.79% | 40.05% | 67.71% | 49.54% |
| **9** | 93.21% | 88.30% | 84.48% | 103.88% | 46.24% | 50.72% | 71.43% | 65.82% |
| **10** | 102.98% | 100.17% | 94.35% | 108.64% | 56.75% | 61.44% | 91.37% | 81.94% |

**Table S2.** First order release profile of 4 formulations of metformin HCl microspheres and nanoparticles.

| **Time (Hour)** | **Log Cumulative % of Drug Release** | | | | | | | |
| --- | --- | --- | --- | --- | --- | --- | --- | --- |
| **Microspheres** | | | | **Nanoparticles** | | | |
| **A1** | **A2** | **A3** | **A4** | **B1** | **B2** | **B3** | **B4** |
| **0** | 0 | 0 | 0 | 0 | 0 | 0 | 0 | 0 |
| **1** | 1.42 | 1.42 | 1.45 | 1.71 | 1.06 | 1.21 | 1.27 | 1.27 |
| **2** | 1.77 | 1.54 | 1.48 | 1.89 | 1.14 | 1.32 | 1.29 | 1.41 |
| **3** | 1.83 | 1.68 | 1.58 | 1.92 | 1.36 | 1.48 | 1.41 | 1.46 |
| **4** | 1.85 | 1.70 | 1.68 | 1.92 | 1.40 | 1.50 | 1.47 | 1.53 |
| **5** | 1.86 | 1.74 | 1.71 | 1.94 | 1.42 | 1.53 | 1.63 | 1.57 |
| **6** | 1.91 | 1.79 | 1.76 | 1.95 | 1.48 | 1.56 | 1.65 | 1.59 |
| **7** | 1.93 | 1.89 | 1.78 | 1.96 | 1.54 | 1.58 | 1.71 | 1.60 |
| **8** | 1.95 | 1.92 | 1.81 | 1.98 | 1.55 | 1.60 | 1.83 | 1.69 |
| **9** | 1.97 | 1.95 | 1.93 | 2.03 | 1.67 | 1.71 | 1.85 | 1.82 |
| **10** | 2.01 | 2.00 | 1.97 | 2.04 | 1.75 | 1.79 | 1.96 | 1.91 |

**Table S3.** Higuichi plot of 4 formulations of metformin HCl microspheres and nanoparticles.

| **Square Root of Time (Hour)** | **Cumulative % of Drug Release** | | | | | | | |
| --- | --- | --- | --- | --- | --- | --- | --- | --- |
| **Microspheres** | | | | **Nanoparticles** | | | |
| **A1** | **A2** | **A3** | **A4** | **B1** | **B2** | **B3** | **B4** |
| 0 | 0 | 0 | 0 | 0 | 0 | 0 | 0 | 0 |
| 1.00 | 26.54 | 26.54 | 27.93 | 51.62 | 11.56 | 16.16 | 18.53 | 18.53 |
| 1.41 | 59.43 | 35.05 | 29.95 | 78.38 | 13.72 | 20.99 | 19.54 | 25.88 |
| 1.73 | 67.97 | 47.63 | 38.32 | 83.40 | 23.13 | 30.49 | 25.88 | 28.63 |
| 2.00 | 70.80 | 49.79 | 47.65 | 84.12 | 25.28 | 31.72 | 29.54 | 34.08 |
| 2.24 | 72.21 | 55.38 | 51.42 | 87.61 | 26.33 | 34.10 | 42.24 | 36.83 |
| 2.45 | 81.97 | 60.98 | 57.47 | 89.72 | 30.52 | 36.48 | 45.02 | 38.66 |
| 2.65 | 84.81 | 78.43 | 60.76 | 91.82 | 34.72 | 37.68 | 51.38 | 39.57 |
| 2.83 | 89.70 | 83.40 | 64.96 | 96.01 | 35.79 | 40.05 | 67.71 | 49.54 |
| 3.00 | 93.21 | 88.30 | 84.48 | 107.88 | 46.24 | 50.72 | 71.43 | 65.82 |
| 3.16 | 102.98 | 100.17 | 94.35 | 108.64 | 56.75 | 61.44 | 91.37 | 81.94 |

**Table S4.** Korsmeyer-Peppas plot of 4 formulations of metformin HCl loaded microspheres and nanoparticles.

| **Log of Time (Hour)** | **Log of fraction of Drug Release** | | | | | | | |
| --- | --- | --- | --- | --- | --- | --- | --- | --- |
| **Microspheres** | | | | **Nanoparticles** | | | |
| **A1** | **A2** | **A3** | **A4** | **B1** | **B2** | **B3** | **B4** |
| 0 | 0 | 0 | 0 | 0 | 0 | 0 | 0 | 0 |
| 0.00 | -0.58 | -0.58 | -0.55 | -0.50 | -0.94 | -0.79 | -0.73 | -0.73 |
| 0.30 | -0.23 | -0.46 | -0.52 | -0.29 | -0.86 | -0.68 | -0.71 | -0.59 |
| 0.48 | -0.17 | -0.32 | -0.42 | -0.18 | -0.64 | -0.52 | -0.59 | -0.54 |
| 0.60 | -0.15 | -0.30 | -0.32 | -0.11 | -0.60 | -0.50 | -0.53 | -0.47 |
| 0.70 | -0.14 | -0.26 | -0.29 | -0.06 | -0.58 | -0.47 | -0.37 | -0.43 |
| 0.78 | -0.09 | -0.21 | -0.24 | -0.05 | -0.52 | -0.44 | -0.35 | -0.41 |
| 0.85 | -0.07 | -0.11 | -0.22 | -0.04 | -0.46 | -0.42 | -0.29 | -0.40 |
| 0.90 | -0.05 | -0.08 | -0.19 | -0.02 | -0.45 | -0.40 | -0.17 | -0.31 |
| 0.95 | -0.03 | -0.05 | -0.07 | 0.02 | -0.33 | -0.29 | -0.15 | -0.18 |
| 1.00 | 0.01 | 0.00 | -0.03 | 0.04 | -0.25 | -0.21 | -0.04 | -0.09 |

**Table S5:** Successive fractional dissolution time of microspheres (A1, A2, A3 and A4) and nanoparticles (B1, B2, B3 and B4)

| **Formulations** | **T25% (h)** | **T50% (h)** | **T75% (h)** | **T80% (h)** | **T90% (h)** |
| --- | --- | --- | --- | --- | --- |
| **A1** | 2.159 | 4.317 | 6.476 | 6.908 | 7.771 |
| **A2** | 2.427 | 4.854 | 7.281 | 7.767 | 8.738 |
| **A3** | 2.648 | 5.296 | 7.944 | 8.474 | 9.533 |
| **A4** | 1.952 | 3.904 | 5.856 | 6.246 | 7.027 |
| **B1** | 4.724 | 9.449 | 14.173 | 15.118 | 17.008 |
| **B2** | 4.147 | 8.294 | 12.441 | 13.270 | 14.929 |
| **B3** | 3.015 | 6.029 | 9.044 | 9.647 | 10.853 |
| **B4** | 3.445 | 6.891 | 10.336 | 11.025 | 12.403 |

**Table S6.** The permeability profiles of metformin HCl API powder (MAPI), selected formulation A4 of microspheres (A4MS) and B3 of nanoparticles (B3NP).

| **Time (Hour)** | **Log Cumulative % of Drug Permeation** | | |
| --- | --- | --- | --- |
| **MAPI** | **A4MS** | **B3NP** |
| 0 | 0.00 | 0.00 | 0.00 |
| 1 | 15.48 | 28.92 | 16.38 |
| 2 | 20.02 | 36.18 | 19.23 |
| 3 | 27.24 | 43.00 | 24.85 |
| 6 | 57.69 | 64.97 | 60.39 |

**Table S7.** Data of metformin HCl transferred through non-everted intestinal sac (n=3) from metformin HCl API powder (MAPI), selected formulation A4 of microspheres (A4MS) and B3 of nanoparticles (B3NP)

| **Formulation** | **R2** | **Intercept** | **Papp (cm/s ×10−5)** | **Total Permeation** |
| --- | --- | --- | --- | --- |
| MAPI | 0.996 | 0.17 | 7.23 | 57.69% |
| A4MS | 0.999 | 21.55 | 10.65 | 64.97% |
| B3NP | 0.986 | 4.23 | 9.59 | 60.39% |
